# Supplementary material for: An ultraprocessive, accurate reverse transcriptase encoded by a metazoan group II intron
Source: PubMed Central journal article supplement (PMC5769746; doi:10.1261/rna.063479.117), 2018-02
Supplement: supp_063479.117_Supplemental_Fig_S1.pdf [file supp_063479.117_Supplemental_Fig_S1.pdf]

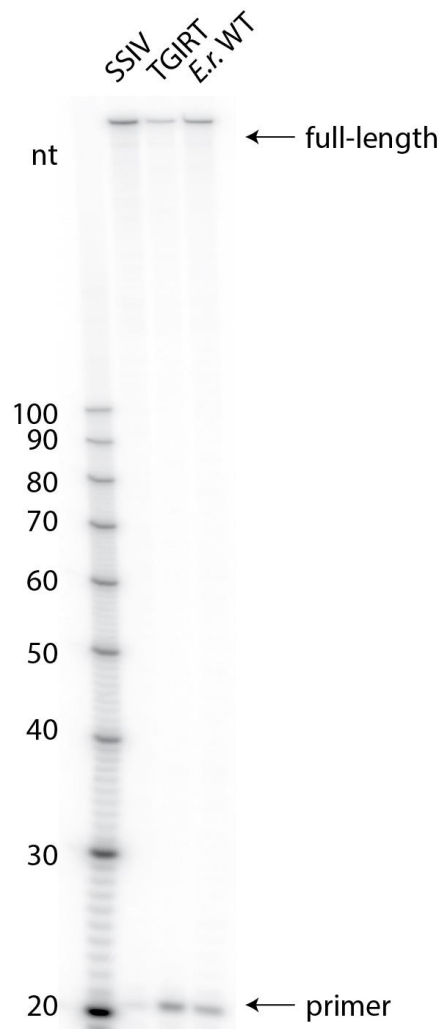

**Supplementary figure 1 Multi-turnover RT reaction using RepA D3 as template. SSIV: Superscript IV.**
