# Supplementary material for: An ultraprocessive, accurate reverse transcriptase encoded by a metazoan group II intron
Source: PubMed Central journal article supplement (PMC5769746; doi:10.1261/rna.063479.117), 2018-02
Supplement: supp_063479.117_Supplemental_Table_S1.pdf [file supp_063479.117_Supplemental_Table_S1.pdf]

| RNA template | Annealing position | Sequence                       |
|--------------|--------------------|--------------------------------|
| RepA D1      | 387                | 5' ACCATATTTCCATCCACCAAGCGC 3' |
| RepA D3      | 1630               | 5' TAATAGGTGAGGTTTCAATG 3'     |
| HCV genome   | 4940 (F)           | 5' GTCTCCGCTGGTGTGAG 3'        |
| HCV genome   | 5069 (E)           | 5' GCTTGCTTTGTTTGGGAGAG 3'     |
| HCV genome   | 5912 (D)           | 5' AATGCCCGCACCATATCC 3'       |
| HCV genome   | 8051 (C)           | 5' GGAATTGGTGTGTTGTGGGTC 3'    |
| HCV genome   | 8953 (B)           | 5' TTGGACCATGAGAATGGAGAAG 3'   |
| HCV genome   | 9461 (A)           | 5' AAGGAACAGTTAGCTATGGAGTG 3'  |

**Supplementary Table 1 Primer sequences used for RT assays.** Annealing position is the nucleotide number on RNA template that anneals to the very 5' end of the primers.
