# Supplementary material for: An ultraprocessive, accurate reverse transcriptase encoded by a metazoan group II intron
Source: PubMed Central journal article supplement (PMC5769746; doi:10.1261/rna.063479.117), 2018-02
Supplement: supp_063479.117_Supplemental_Table_S2.pdf [file supp_063479.117_Supplemental_Table_S2.pdf]

| RT                  |                                                                   |
|---------------------|-------------------------------------------------------------------|
| 2nd strand          | CTACACGACGCTCTTCCGATCTCTGNNNNNNNNNNNNNNNGATTATAGGACATTTAGGTCGTAC  |
| RT                  | CAGACGTGTGCTCTTCCGATCGGTANNNNNNNNNNNNNNACATTTCTAACTGGAAGTCAAGC    |
| PCR amplification   |                                                                   |
| forward             | CTACACGACGCTCTTCCGATCT                                            |
| reverse             | CAGACGTGTGCTCTTCCGATC                                             |
| Sequencing adaptors |                                                                   |
| index2              | CAAGCAGAAGACGGCATACGAGATACATCGGTGACTGGAGTTCAGACGTGTGCTCTTCCGATCT  |
| index4              | CAAGCAGAAGACGGCATACGAGATGGTCAGTGACTGGAGTTCAGACGTGTGCTCTTCCGATCT   |
| index5              | CAAGCAGAAGACGGCATACGAGATACAGTGGT GACTGGAGTTCAGACGTGTGCTCTTCCGATCT |
| index7              | CAAGCAGAAGACGGCATACGAGATCAGATCGTGACTGGAGTTCAGACGTGTGCTCTTCCGATCT  |
| universal           | AATGATACGGCGACCACCGAGATCTACACTCTTCCCTACACGACGCTCTTCCGATC          |

**Supplementary Table 2 Primer sequences used for error rate determination.** N indicates random nucleotide, and the string of 15 Ns is the product barcode (UMI). Blue color indicates condition barcode. Green and yellow regions indicate complementary sequences for PCR amplification. Red regions indicate Illumina index.
